1 **Effects of domestication on neophobia: A comparison between the domesticated Bengalese**  
2 **finch (*Lonchura striata* var. *domestica*) and its wild ancestor, the white-rumped munia**  
3 **(*Lonchura striata*)**

4

5 Kenta Suzuki<sup>a,c,d,e,\*</sup>, Maki Ikebuchi<sup>c,d,e</sup>, Hiroko Kagawa<sup>b,c,d,e</sup>, Taku Koike<sup>c</sup>, Kazuo Okanoya<sup>b,c,d,e</sup>

6 <sup>a</sup> *Faculty of Health Sciences, Nihon Institute of Medical Science, Moroyama-machi 350-0435,*

7 *JAPAN*

8 <sup>b</sup> *Department of Life Sciences, Graduate School of Arts and Sciences, The University of Tokyo,*

9 *Meguro-ku, Tokyo 153-8902, JAPAN*

10 <sup>c</sup> *Laboratory for Bilingualistics, RIKEN Brain Science Institute (BSI), Wako, Saitama 351-0198,*

11 *JAPAN*

12 <sup>d</sup> *Okanoya Emotional Information Project, Exploratory Research for Advanced Technology*

13 *(ERATO), Japan Science and Technology Agency (JST), Wako, Saitama 351-0198, JAPAN*

14 <sup>e</sup> *Cognition and Behavior Joint Research Laboratory, RIKEN Center for Brain Science (CBS), Wako,*

15 *Saitama 351-0198, JAPAN*

16 \*Corresponding author: Faculty of Health Sciences, Nihon Institute of Medical Science, 1276

17 Shimogawara, Moroyama-machi, Iruma-gun, Saitama 350-0435, JAPAN. Tel.: +81-49-294-9000,

18 Fax: +81-49-294-9009.

19 E-mail address: kentszk@gmail.com (K. Suzuki).

20 **ABSTRACT**

21 Bengalese finches (*Lonchura striata* var. *domestica*) have more complex song traits than their wild  
22 ancestors, white-rumped munias (*Lonchura striata*). Domesticated finches are likely able to allocate  
23 more resources to song development rather than allocating resources to mechanisms aimed at coping  
24 with predation, which are no longer needed under domesticated conditions. Here, we aimed to  
25 examine the effects of changes in selection pressure due to domestication on the behaviour of  
26 Bengalese finches and to contemplate the possible evolutionary mechanisms underlying these  
27 changes. To do so, we compared neophobic responses to novel-object conditions as an assessment of  
28 reactions to potential predators. We studied groups of Bengalese finches and white-rumped munias  
29 and found that Bengalese finches were more likely to eat the food provided to them under  
30 novel-object conditions. Bengalese finches had a shorter latency time to eat, and this latency time  
31 was less affected by the novel object in the case of Bengalese finches compared to white-rumped  
32 munias. Therefore, Bengalese finches have reduced neophobic responses due to domestication. The  
33 behavioural strategies of white-rumped munias appear to be more suitable for natural environments,  
34 which include unpredictable risks, whereas Bengalese finches have likely adapted their behaviour to  
35 the conditions of artificial selection.

36

37 **Keywords:** Bengalese finch (*Lonchura striata* var. *domestica*); Domestication; Neophobia;

38 Neophobic response; White-rumped munia (*Lonchura striata*)

39 **Abbreviations**

40 BF, Bengalese finch; WRM, white-rumped munia.

41

42 **1. Introduction**

43           The Bengalese finch (BF, *Lonchura striata* var. *domestica*) is a domesticated variety of the  
44 wild white-rumped munia (WRM, *Lonchura striata*), which was imported from China to Japan  
45 approximately 250 years ago (Washio, 1996; Okanoya, 2004a; Svanberg, 2008). BFs sing  
46 phonologically and syntactically complex songs, as opposed to the stereotypical simple songs sung  
47 by WRMs (Honda and Okanoya, 1999; Okanoya, 2004a, b). The complex songs of BF have not  
48 been selected artificially (Washio, 1996). Complex song as a high-quality sexual trait is  
49 believed to have evolved through the domestication process in BFs (Okanoya, 2004a, b). WRMs are  
50 thought to experience strong natural selection pressures in wild environments. Conversely,  
51 domesticated BFs experience safe and resource-rich conditions under human-controlled rearing  
52 conditions (i.e., no environmental perturbations, no predation, abundant food, and low risk of  
53 parasitism and injury). Thus, we hypothesised that the relaxation of natural selection pressures and  
54 the presence of artificial selection may have led BFs to allocate fewer resources to behaviours  
55 associated with efforts for survival and more to efforts associated with reproduction.

56           Domestication results in species being removed from many natural selection pressures;

57 however, domesticated species are exposed to artificial selection pressures exerted by their captive  
58 environments and by humans (Fox, 1968; Boice, 1973; Ratner and Boice, 1975; Price, 1984). This  
59 change in selection pressure results in changes in physiological and behavioural traits (Hale, 1969;  
60 Price, 1984, Künzl and Sachser, 1999; Lepage et al., 2000). Domesticated species have reduced  
61 behavioural expressions related to ontogenetic survival, such as fear responses (Desforges and  
62 Wood-Gush, 1975; Schütz et al., 2001; Campler et al., 2009), and have enhanced behavioural traits  
63 that are not directly related to survival, such as sexual and reproductive behaviours (Künzl and  
64 Sachser, 1999). Therefore, these behavioural changes have been a major target of domestication  
65 effects.

66           In natural environments, birds must be vigilant of unpredictable risks such as predation  
67 when foraging or eating; this is particularly important while approaching novel conditions such as  
68 novel places, objects, and food items. Neophobia is the aversion that an animal displays while  
69 approaching novel conditions (Greenberg, 2003). In birds, the most well-established behavioural  
70 responses to novel conditions (neophobic responses) are the reactions to potential predators  
71 (Greenberg, 1990). In the wild, the presence of unpredictable risks is considered to enhance induced  
72 neophobia (Brown et al., 2020). Domesticated BFs are likely able to allocate more resources to  
73 reproduction (e.g., song development) as a trade-off for a reduction in the behaviours and strategies  
74 aimed at coping with predation (e.g., neophobic responses). In the present study, to examine the

75 effects of changes in selection pressure due to domestication on the behaviour of BFs, and to  
76 contemplate the evolutionary mechanisms underlying these effects, we compared neophobic  
77 responses to novel conditions in BFs and their wild ancestors, WRMs. To the best of our knowledge,  
78 this is the first study that evaluates neophobia in Bengalese finches and white-rumped munias, which  
79 also explores the evolutionary mechanisms of behavioural changes in domesticated animals,  
80 including the evolution of complex songs through human self-domestication.

81

## 82 **2. Materials and methods**

### 83 *2.1 Birds used in this study*

84           Seventy BFs and 60 WRMs were used in the experiment. All the birds were sexually  
85 mature. BFs (n = 10) were bought from local suppliers and others (n = 60) were bred in our  
86 laboratory. WRMs were captured in the wild in Taiwan. These captured birds were reared for  
87 more than a year in our laboratory before being used in this study. Birds were housed in a  
88 group of 8 (one group of WRM) or 10 per cage resulting in us using seven groups of BFs and six  
89 groups of WRMs for our experiments. Sex ratios of the birds that made up the groups were different  
90 for each cage (BF-1 and WRM-1: all females, BF-2, 3 and WRM-2: all males, BF-4, 5 and WRM-3,  
91 4: 50% of each sex, BF-6, 7 and WRM-5, 6: 6 males and 4 females). Birds were housed in stainless  
92 steel cages (370 × 415 × 440 mm) within an animal-rearing room at RIKEN Brain Science Institute

93 (BSI) and given finch seed mixture, shell grit, and vitamin-enhanced water *ad libitum*. The light  
94 cycle was kept constant at 14 h light and 10 h dark. The room was maintained at an ambient  
95 temperature of approximately 25 °C, with a humidity of 50 %. The birds were acclimatized for at  
96 least four months to the animal-rearing room before performing the experiments. All experimental  
97 procedures and the housing conditions of the birds were approved by the Animal Experiments  
98 Committee at RIKEN (#H20-2-231, #H22-2-217), and all the birds were cared for in accordance  
99 with the Institutional Guidelines of RIKEN for experiments using animals.

100

## 101 *2.2 Novel-object experiment*

102           Before the experiment, each group of birds was transferred from their home cage in the  
103 animal-rearing room to a testing cage (with the same dimensions and characteristics as the home  
104 cage) in a sound-proof box. To avoid the effects of isolation stress, experiments were conducted  
105 using the same groups of birds that were housed together during keeping. The test cage was  
106 equipped with two wooden perches and with food and water. Experiments were conducted under two  
107 conditions: the control (non-object) condition and the novel-object condition. Experiments were  
108 carried out under the different conditions on different days. New food and water were provided at the  
109 beginning of the experiments. Under the novel-object condition, a novel object (a small toy dog,  
110 approximately 15 mm × 15 mm × 20 mm) was placed on the food. The behaviour of birds was

111 recorded for 60 min using a video camera. We quantified the number of groups of birds that ate food  
112 during the observation period (at least one bird in the group) and the latency time (the time that  
113 passed before first birds started eating the food) under both conditions. If the birds did not approach  
114 or eat the food during the test period, the latency time of the birds was set at the maximum time  
115 (3600 s). All groups were used only once under both conditions. All tests were conducted between  
116 13:00 and 15:00 to avoid other factors that could affect our results, such as diurnal changes in  
117 activity, hunger, and hormone levels.

118

### 119 *2.3 Statistical analyses*

120           The numbers of groups of BFs and WRMs that ate the food during the observation period  
121 were compared with Fisher's exact test. The latency times to start eating the food are represented as  
122 the mean  $\pm$  standard error of the mean (SEM). The latency times in BFs and WRMs were analysed  
123 using a repeated measures two-way analysis of variance (ANOVA) (birds  $\times$  conditions) with  
124 post-hoc Bonferroni/Dunn tests. The difference in the effect of the novel object on the latency times  
125 (calculated as the latency times under the novel-object conditions - the latency times under control  
126 conditions) between BFs and WRMs were analysed by an unpaired *t*-test with a Welch's correction.  
127 Values of  $p < 0.05$  were considered significant. We used three different statistical software packages  
128 for analyses. Statistical analyses were performed using R statistical software (version 4.03, R



129 Foundation for Statistical Computing, Vienna, Austria) for Fisher's extract test, Stat View software  
130 (version 5, SAS Institute Inc., Cary, NC, USA) for repeated measures 2-way ANOVA with post-hoc  
131 Bonferroni/Dunn tests, and GraphPad Prism software (version 4, GraphPad Software Inc., San  
132 Diego, CA, USA) for *t*-tests with a Welch's correction.

133

### 134 **3. Results**

#### 135 *3.1 Responses of BFs and WRMs to novel objects*

136 We examined the effects of domestication on behavioural responses to novel objects in  
137 BFs and WRMs. Under control conditions, all groups of birds (both BFs and WRMs) ate the food at  
138 some point during the observation time (BFs: 7/7, 100 %; WRMs: 6/6, 100 %). Thus, there were no  
139 differences between BFs and WRMs ( $p = 1.00$ ). However, under the novel-object conditions, six of  
140 the seven groups of BFs (6/7, 85.7 %) ate the food at some point during the observation time,  
141 whereas none of the WRMs groups ate the food (0/6, 0 %). Therefore, there were significant  
142 differences between BFs and WRMs ( $p < 0.01$ ). In BFs, there were no significant differences in the  
143 number of groups that ate the food between the control and novel-object conditions ( $p > 0.90$ ).  
144 However, WRMs were significantly less likely to eat the food under the novel-object conditions ( $p <$   
145  $0.01$ ).

146

147 *3.2 Latency times in BFs and WRMs to start eating food under control and novel-object conditions*

148           The latency times to start eating the food were compared between BFs and WRMs (Fig.  
149 1). Under the control conditions, the latency times were  $25.6 \pm 9.0$  s for BFs and  $159.0 \pm 46.7$  s for  
150 WRMs. Under the novel-object conditions, the latency times were  $1204.9 \pm 524.9$  s for BFs, but  
151 none of the WRMs approached the food within the observation time ( $3600.0 \pm 0.0$  s). The latency  
152 times was significantly affected by the birds (BF or WRM,  $F(1, 11) = 16.9$ ,  $p < 0.01$ ), conditions  
153 (novel object or control,  $F(1, 11) = 69.4$ ,  $p < 0.0001$ ), and interactions (birds  $\times$  conditions,  $F(1, 11)$   
154  $= 12.7$ ,  $p < 0.01$ ). Latency times to eat were significantly shorter in BFs than in WRMs regardless of  
155 the presence or absence of novel objects (control conditions:  $p < 0.05$ , novel-object conditions:  $p <$   
156  $0.01$ ). In both species, the latency times were extended by the presence of the novel object (BFs:  $p <$   
157  $0.05$ , WRMs:  $p < 0.0001$ ), and the extended times were significantly longer in WRMs than those in  
158 BFs (BFs:  $1379.3 \pm 530.7$  s, WRM:  $3441.0 \pm 46.7$  s;  $t = 3.87$ ,  $p < 0.01$ ).

159

160 **4. Discussion**

161           We compared responses to novel conditions in BFs and their wild ancestor, WRMs, and  
162 examined the effects of changes in selection pressure due to domestication. Our findings indicate  
163 that these two birds responded differently to novel-object conditions. BFs had significantly lower  
164 neophobia levels (more groups of BFs ate the food, and BFs had shorter latency times to eat under

165 novel-object conditions) than those of their wild ancestors, the WRMs. The novel objects extended  
166 the latency times to eat in both birds, but latency times were significantly longer in WRMs than  
167 those in BFs. Therefore, it is likely that BFs have reduced neophobic responses due to domestication.  
168 Under control conditions, the proportion of the groups that ate the food was the same in BFs and  
169 WRMs. However, BFs ate the food sooner than WRMs. It is probable that the WRMs were more  
170 cautious about the experimental situation (the soundproof box is different from the WRMs' normal  
171 environment). In a previous report, male WRMs had higher faecal corticosterone concentrations than  
172 those in male BFs (Suzuki et al., 2012; 2014a, b). Therefore, WRMs are considered to have a higher  
173 level of baseline vigilance than that in BFs. This strain difference with respect to vigilance seems to  
174 have been further increased under novel-object conditions.

175           Our results are similar to those of a previous study that found that domesticated ducks  
176 (*Anas platyrhynchos* var. *domesticus*) had lower levels of neophobia than those of wild mallards  
177 (*Anas platyrhynchos*) (Desforges and Wood-Gush, 1975). In addition, laboratory mice (*Mus*  
178 *musculus*) had lower levels of neophobia than those in wild mice (Meddock and Osborn, 1968). In a  
179 comparison of dogs (*Canis lupus familiaris*) and wolves (*Canis lupus*), dogs had lower levels of  
180 neophobia than those in wolves, but dogs had an overall lower interest in novel objects (Moretti et  
181 al., 2015). In the present study, BFs showed a fear response to novel objects and were considered to  
182 have no diminished interest in novel objects.

183           This study was conducted using groups of birds, and, as such, there may have been a social  
184 effect. Because it was difficult to identify individuals in this study, the analysis was conducted as a  
185 group-by-group comparison, and it was therefore not possible to take into account the differences in  
186 the responses of each individual. Wolves and dogs spend more time approaching a novel object in  
187 groups than as individuals, so risk sharing may increase vigilance (Moretti et al., 2015). Since this  
188 experiment was conducted using groups, there may have been an effect of risk sharing. Responses to  
189 novel objects may also be influenced by the identities of the group members. In the Gouldian finches  
190 (*Chloebia gouldiae*), shy birds took more risks when they were paired with bold partners, and bold  
191 birds took fewer risks when they were paired with shy partners (King et al., 2015). Therefore, in  
192 experiments conducted using groups, individual differences may be reduced, and more of the  
193 characteristics of the groups may be expressed. Conversely, in experiments conducted using  
194 individuals, there is a high possibility that individual differences will be noticeable. Future studies on  
195 BFs and WRMs should take into consideration the reactions of each individual bird to novel-object  
196 conditions. In a previous study, we compared the tonic immobility response, which can be used as a  
197 measure of fear responses, between individual BFs and WRMs and found that BFs had lower fear  
198 responses (Suzuki et al., 2013). Therefore, we believe that the fear response is lower in BFs than that  
199 in WRMs, even on an individual basis.

200           In this study, the effects of sex ratio and environmental or rearing conditions (bought from

201 local supplier, wild-caught, or bred in the laboratory) were ruled out because the groups in the cages  
202 were neither separated by sex nor by environmental or rearing conditions. Moreover, previous  
203 studies have shown that sex and environmental or rearing conditions of the white-rumped munia  
204 (captive-born, bought from a supplier, or captured) did not affect the fear response (tonic immobility  
205 reactions) (Suzuki et al., 2013). Additionally, the conditions under which Bengalese finches and  
206 white-rumped munias were bred or reared did not affect the corticosterone levels, which is known to  
207 affect fear responses (Suzuki et al., 2012). All the munias used in this experiment were wild-caught;  
208 however, differences in rearing conditions have not been an issue in previous experiments.  
209 Therefore, the magnitude of the impact of these factors is small, but it must be considered in future  
210 research.

211 In summary, this is the first study that evaluates neophobia in Bengalese finches and  
212 white-rumped munias. Our results suggest that the domestication process led to differences in the  
213 responses of BFs and WRMs to novel conditions. The behavioural strategies of WRMs seem to be  
214 suitable for the natural environment, which includes unpredictable risks, whereas BFs might have  
215 adapted their behaviours to the conditions of captivity and artificial selection. BFs are likely able to  
216 allocate the resources that would be needed in the wild to cope with predators to song development,  
217 due to domestication. Our results can provide insights into the evolutionary mechanisms of  
218 domestication phenotypes (domestication syndrome), including human self-domestication processes

219 of other domesticated species.

220

## 221 **Acknowledgements**

222 We thank members of the Biolinguistics team (RIKEN BSI, Saitama, Japan) for animal

223 care. This study was supported by RIKEN BSI and Japan science and technology agency (JST) - the

224 exploratory research for advanced technology (ERATO) research funding.

225

## 226 **Declarations of interest**

227 None

228

## 229 **Author contributions**

230 **Kenta Suzuki:** Conceptualization, Data curation, Formal analysis, Investigation, Methodology,

231 Visualization, Writing - original draft; **Maki Ikebuchi:** Conceptualization; **Hiroko Kagawa:**

232 Conceptualization, Writing - review & editing; **Taku Koike:** Data curation, Investigation; **Kazuo**

233 **Okanoya:** Conceptualization, Funding acquisition, Supervision, Writing - review & editing.

234

## 235 **Funding**

236 This work was supported by JSPS KAKENHI [grant numbers 15K14581, 17H06380,

237 20H00105] to KO.

238

239 **References**

240

241 Boice, R., 1973. Domestication. *Psychol. Bull.* 80, 215–230. <https://doi.org/10.1037/h00348>.

242

243 Brown, G.E., Demers, E.E., Goldman, J.A., Singh, A., Chivers, D.P., Ferrari, M.C., 2020.

244 Unpredictable risk enhances induced neophobia in northern red-bellied dace. *Anim. Behav.* 168,

245 121–127. <https://doi.org/10.1016/j.anbehav.2020.08.012>.

246

247 Campler, M., Jöngren, M., Jensen, P., 2009. Fearfulness in red junglefowl and domesticated White

248 Leghorn chickens. *Behav. Processes* 81, 39–43. <https://doi.org/10.1016/j.beproc.2008.12.018>.

249

250 Desforges, M.F., Wood-Gush, D.G.M., 1975. A behavioural comparison of domestic and mallard

251 ducks. Habituation and flight reactions. *Anim. Behav.* 23, 692–697.

252 [https://doi.org/10.1016/0003-3472\(75\)90145-1](https://doi.org/10.1016/0003-3472(75)90145-1).

253

254 Fox, M.W., 1968. The influence of domestication upon behavior of animals. in: Fox, M.W. (Ed),

255 *Abnormal behaviour in animals*. Saunders, Philadelphia, London, pp. 64–76.

256

257 Greenberg, R.S., 1990. Ecological plasticity, neophobia, and resource use in birds. *Stud. Avian Biol.*

258 13, 431–437.

259

260 Greenberg, R.S., 2003. The role of neophobia and neophilia in the development of innovative

261 behaviour of birds. in: Reader, S.N. and Laland, K.N. (Eds), *Animal innovation*. Oxford university

262 press, NY, pp. 175–196.

263

264 Hale, E.B., 1969. Domestication and the evolution of behaviour. in: Hafez, E.S.E. (Ed) *The*

265 *Behaviour of Domestic Animals*, 2nd Edition. Baillière, Tindall and Cassell, London, pp. 22–42.

266

267 Honda, E., Okanoya, K., 1999. Acoustical and syntactical comparisons between songs of the

268 white-backed munia (*Lonchura striata*) and its domesticated strain, the Bengalese finch (*Lonchura*

269 *striata* var. *domestica*). *Zool. Sci.* 16, 319–326. <https://doi.org/10.2108/zsj.16.319>.

270

271 King, A.J., Williams, L.J., Mettke-Hofmann, C., 2015. The effects of social conformity on Gouldian

272 finch personality. *Anim. Behav.* 99, 25–31. <https://doi.org/10.1016/j.anbehav.2014.10.016>.

273

274 Künzl, C., Sachser, N., 1999. The behavioral endocrinology of domestication: A comparison



275 between the domestic guinea pig (*Cavia apereaf.porcellus*) and its wild ancestor, the cavy (*Cavia*  
276 *aperea*). *Horm. Behav.* 35, 28–37. <https://doi.org/10.1006/hbeh.1998.1493>.

277

278 Lepage, O., Øverli, Ø., Petersson, E., Järvi, T., Winberg, S., 2000. Differential stress coping in wild  
279 and domesticated sea trout. *Brain Behav. Evol.* 56, 259–268. <https://doi.org/10.1159/000047209>.

280

281 Meddock, T.D., Osborn, D.R., 1968. Neophobia in wild and laboratory mice. *Psychonom. Sci.* 12(5),  
282 223–223. <https://doi.org/10.3758/BF03331280>.

283

284 Moretti, L., Hentrup, M., Kotrschal, K., Range, F., 2015. The influence of relationships on  
285 neophobia and exploration in wolves and dogs. *Anim. Behav.* 107, 159–173.  
286 <https://doi.org/10.1016/j.anbehav.2015.06.008>.

287

288 Okanoya, K., 2004a. Song syntax in Bengalese finches: proximate and ultimate analyses. *Adv. Stud.*  
289 *Behav.* 34, 297–346. [https://doi.org/10.1016/S0065-3454\(04\)34008-8](https://doi.org/10.1016/S0065-3454(04)34008-8).

290

291 Okanoya, K., 2004b. The Bengalese finch: a window on the behavioral neurobiology of birdsong  
292 syntax. *Ann. N. Y. Acad. Sci.* 1016, 724–735. <https://doi.org/10.1196/annals.1298.026>.

293

294 Price, E.O., 1984. Behavioral aspects of animal domestication. *Q. Rev. Biol.* 59, 1–32.

295 <https://doi.org/10.1086/413673>.

296

297 Ratner, S.C., Boice, R., 1975. Effects of domestication on behaviour. in: Hafez, E.S.E. (ed), *The*  
298 *behaviour of domestic animals*, third ed., Williams & Wilkins, Baltimore, pp. 3–19.

299

300 Schütz, K.E., Forkman, B., Jensen, P., 2001. Domestication effects on foraging strategy, social  
301 behaviour and different fear responses: a comparison between the red junglefowl (*Gallus gallus*) and  
302 a modern layer strain. *Appl. Anim. Behav. Sci.* 74(1), 1–14.

303 [https://doi.org/10.1016/S0168-1591\(01\)00156-3](https://doi.org/10.1016/S0168-1591(01)00156-3).

304

305 Suzuki, K., Ikebuchi, M., Bischof, H. J., Okanoya, K., 2014a. Behavioral and neural trade-offs  
306 between song vcomplexity and stress reaction in a wild and a domesticated finch strain. *Neurosci.*  
307 *Biobehav. Rev.* 46, 547–556. <https://doi.org/10.1016/j.neubiorev.2014.07.011>.

308

309 Suzuki, K., Ikebuchi, M., Okanoya, K., 2013. The impact of domestication on fearfulness: a  
310 comparison of tonic immobility reactions in wild and domesticated finches. *Behav. Processes.* 100,

311 58–63. <https://doi.org/10.1016/j.beproc.2013.08.004>.

312

313 Suzuki, K., Matsunaga, E., Yamada, H., Kobayashi, T., Okanoya, K., 2014b. Complex song

314 development and stress hormone levels in the Bengalese finch. *Avian Biol. Res.* 7(1), 10–17.

315 <https://doi.org/10.3184/175815514X13903270812502>.

316

317 Suzuki, K., Yamada, H., Kobayashi, T., Okanoya, K., 2012. Decreased fecal corticosterone levels

318 due to domestication: a comparison between the white-backed munia (*Lonchura striata*) and its

319 domesticated strain, the Bengalese finch (*Lonchura striata* var. *domestica*) with a suggestion for

320 complex song evolution. *J. Exp. Zool. A* 317, 561–570. <https://doi.org/10.1002/jez.1748>.

321

322 Svanberg, I., 2008. Towards a cultural history of the Bengalese Finch (*Lonchura domestica*). *Der*

323 *Zoologische Garten* 77(5–6), 334–344. <https://doi.org/10.1016/j.zoolgart.2008.05.003>.

324

325 Washio, K., 1996. Chasing the mystery of the Bengalese finch. Modern Literature Inc., Tokyo. (in

326 Japanese)

327

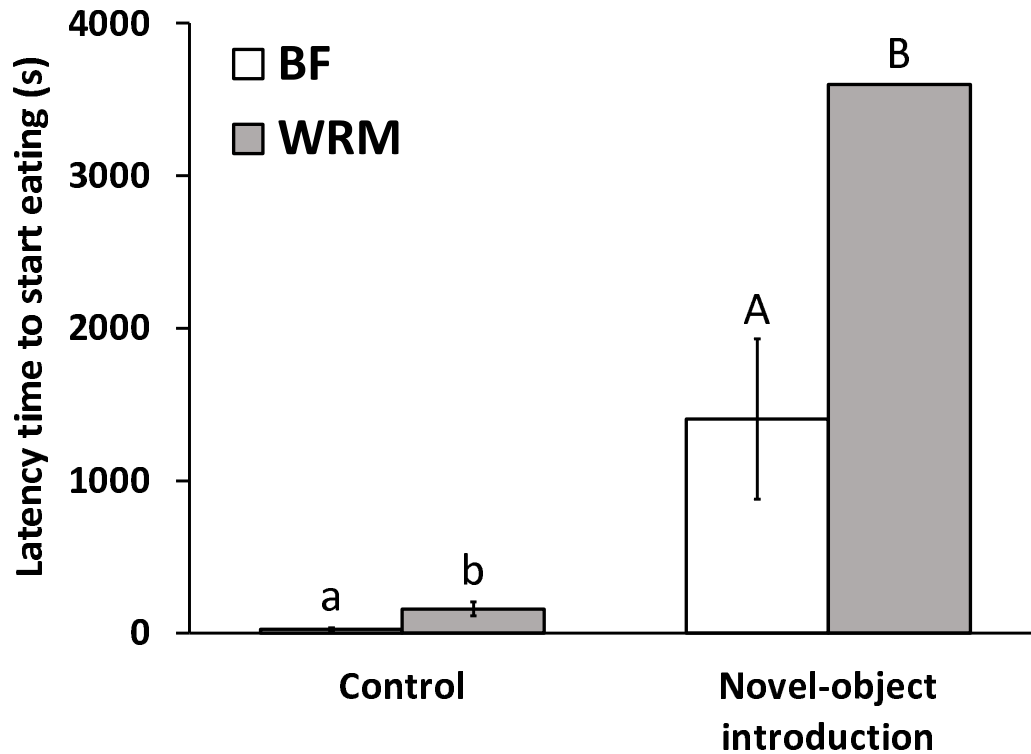

328

329 Fig. 1. Latency times (in seconds) to start eating food in Bengalese finches (BFs, *Lonchura striata*

330 var. *domestica*) and white-rumped munias (WRMs, *Lonchura. striata*). Bars indicate means, and

331 vertical lines indicate standard errors of mean (SEM). BFs had significantly shorter latency times to

332 start eating the provided food than those WRMs under both conditions (control and exposure to a

333 novel object, i.e., a small dog toy). Latency times were extended under novel-object conditions in

334 both BFs and WRMs. Different letters indicate significant differences between groups (a vs b:  $p <$

335 0.05, A vs B:  $p < 0.01$ , a vs A:  $p < 0.05$ , b vs B:  $p < 0.0001$ ).
